# Supplementary material
Source: Springer Nature journal article supplement (https://www.springermedizin.de/resource/supplementary/12902_2008_66_MOESM3_ESM.pdf/9516208)

**IL-1 $\beta$  exposure**  
INS-1E vs. INS-1E-ZnT8-EGFP

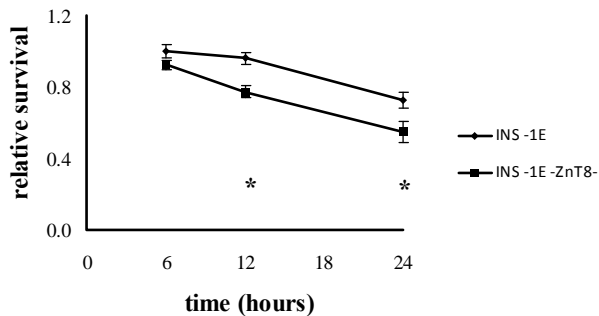

**TNF- $\alpha$  exposure**  
INS-1E vs. INS-1E-ZnT8-EGFP

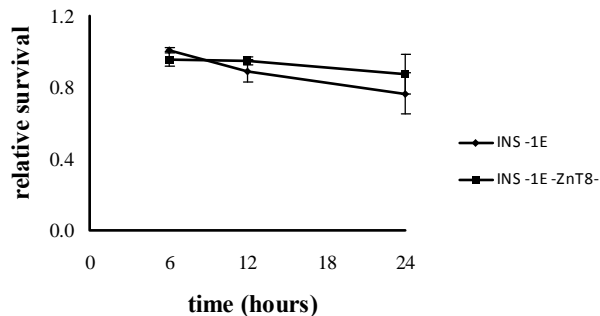

**IFN- $\gamma$  exposure**  
INS-1E vs. INS-1E-ZnT8-EGFP

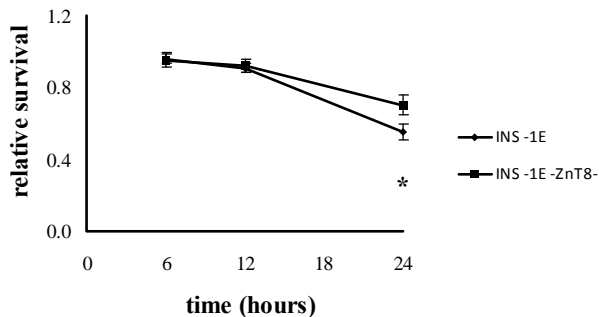

**IL-1 $\beta$ +TNF- $\alpha$ +IFN- $\gamma$  exposure**  
INS-1E vs. INS-1E-ZnT8-EGFP

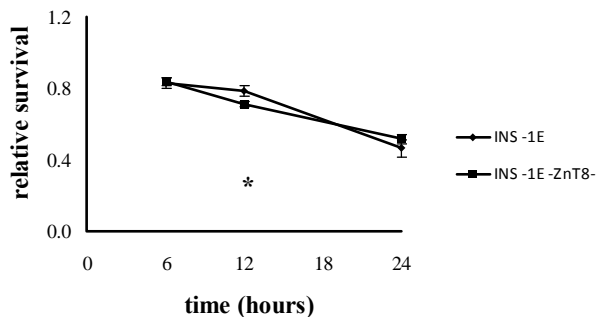

Supplement: MOESM3 [file 9516208]
